# Supplementary material for: Mapping of MPH programs in terms of geographic distribution across various universities and institutes of India—A desk research
Source: Frontiers journal article supplement (doi:10.3389/fpubh.2024.1443844), 2024-08-07
Supplement: Data_Sheet_1.PDF [file Data_Sheet_1.PDF]

## Supplementary Material

**Table No. 1. Unique Identification Codes for Universities and Institutes Offering MPH Programs In India**

| <b>Zones</b> | <b>Unique Identification Code</b> | <b>Name of Universities/Institutes Offering MPH Programs in India</b>    | <b>City/ District</b>               | <b>State/ Union Territory</b> | <b>NAAC accreditation</b> | <b>UGC Classification</b>                     |
|--------------|-----------------------------------|--------------------------------------------------------------------------|-------------------------------------|-------------------------------|---------------------------|-----------------------------------------------|
| <b>NORTH</b> | NCHC1                             | Postgraduate Institute of Medical Education and Research (PGIMER)        | -                                   | Chandigarh                    | Not Accredited            | UGC approved Institute of National Importance |
|              | NCHC2                             | University Institute for Emerging Areas in Science & Technology (UIEAST) | -                                   | Chandigarh                    | Accredited                | State university                              |
|              | NHPS3                             | Akal College of Health and Allied Sciences                               | Sirmaur district                    | Himachal Pradesh              | Accredited                | Private university                            |
|              | NHRG4                             | GD Goenka University                                                     | Gurugram                            | Haryana                       | Not Accredited            | Private university                            |
|              | NHRG5                             | Amity Medical School                                                     | Gurugram                            | Haryana                       | Accredited                | Private university                            |
|              | NHRS6                             | Jindal School of Public Health and Human Development                     | Sonipat                             | Haryana                       | Accredited                | Private university                            |
|              | NHRH7                             | OM Sterling Global University                                            | Hisar                               | Haryana                       | Not Accredited            | Private university                            |
|              | NHRB8                             | Gurugram University                                                      | Gurugram                            | Haryana                       | Accredited                | State university                              |
|              | NHRG9                             | Shree Guru Gobind Singh Tricentenary University                          | Gurugram                            | Haryana                       | Not Accredited            | Private university                            |
|              | NPBS10                            | Rayat Bahra University                                                   | Sahibzada Ajit Singh Nagar (Mohali) | Punjab                        | Accredited                | Private university                            |
|              | NPBB11                            | Adesh Institute of Medical Sciences and Research                         | Bhatinda                            | Punjab                        | Not Accredited            | Private university                            |
|              | NPBF12                            | Desh Bhagat University                                                   | Fatehgarh Sahib                     | Punjab                        | Accredited                | Private university                            |
|              | NPBL13                            | CT University                                                            | Ludhiana                            | Punjab                        | Not Accredited            | Private university                            |
|              | NDLG14                            | Indian Institute of Public Health Delhi                                  | -                                   | Delhi                         | Not Accredited            | UGC approved                                  |

|  |          |                                                    |           |           |                |                                               |
|--|----------|----------------------------------------------------|-----------|-----------|----------------|-----------------------------------------------|
|  |          |                                                    |           |           |                | Institute of National Importance              |
|  | NDLSWD15 | Jawaharlal Nehru University                        | -         | Delhi     | Accredited     | Central university                            |
|  | NDLSWD16 | School of Allied Health Sciences and Management    | -         | Delhi     | Not Accredited | State university                              |
|  | NDLSD17  | Hamdard Institute of Medical Science and Research  | -         | Delhi     | Accredited     | Deemed university                             |
|  | NDLSD18  | ICRI- Gurugram campus                              | -         | Delhi     | Not Accredited | Private university                            |
|  | NDLND19  | National Institute of Health and Family Welfare    | -         | Delhi     | Accredited     | Central university                            |
|  | NDLWD20  | Ambedkar University                                | -         | Delhi     | Accredited     | State university                              |
|  | NRJJA21  | SD Gupta School of Public Health                   | Jaipur    | Rajasthan | Accredited     | Private university                            |
|  | NRJJA22  | School of Humanities, Social Science and Fine Arts | Jaipur    | Rajasthan | Not Accredited | Private university                            |
|  | NRJJA23  | Mahatma Jyoti Rao Phoole University (MJRP)         | Jaipur    | Rajasthan | Not Accredited | Private university                            |
|  | NRJJO24  | All India Institute of Medical Sciences (AIIMS)    | Jodhpur   | Rajasthan | Not Accredited | UGC approved Institute of National Importance |
|  | NRJK25   | Career Point University                            | Kota      | Rajasthan | Not Accredited | Private university                            |
|  | NRJC26   | OPJS University                                    | Churu     | Rajasthan | Not Accredited | Private university                            |
|  | NRJJA27  | Poornima University                                | Jaipur    | Rajasthan | Not Accredited | Private university                            |
|  | NRJJO28  | Jodhpur School of Public Health                    | Jodhpur   | Rajasthan | Not Accredited | Private university                            |
|  | NRJJO29  | Maulana Azad University                            | Jodhpur   | Rajasthan | Not Accredited | Private university                            |
|  | NRJA30   | Sunrise University                                 | Alwar     | Rajasthan | Not Accredited | Private university                            |
|  | NRJJH31  | Jagdishprasad Jhabarmal Tibrewala University       | Jhunjhunu | Rajasthan | Not Accredited | Private university                            |

|                        |         |                                                              |                     |                   |                |                    |
|------------------------|---------|--------------------------------------------------------------|---------------------|-------------------|----------------|--------------------|
|                        | NRJJH32 | Birla Institute of Technology and sciences                   | Jhunjhunu           | Rajasthan         | Accredited     | Deemed university  |
|                        | NRJJA33 | Rajasthan University of Health Sciences                      | Jaipur              | Rajasthan         | Not Accredited | State university   |
|                        | NDLWD34 | Rajiv Gandhi Paramedical Institute                           | -                   | Delhi             | Not Accredited | Not approved       |
|                        | NDLSD35 | Athar Institute of Health and Management Studies             | -                   | Delhi             | Not Accredited | Not approved       |
| <b>NORTH<br/>-EAST</b> | NENLD1  | Global Open University                                       | Dimapur             | Nagaland          | Not Accredited | Private university |
|                        | NESKG2  | Sri Ramaswamy Memorial University Sikkim (SRMUS)             | Gangtok             | Sikkim            | Not Accredited | Private university |
|                        | NEMNI3  | Bir Tikendrajit University                                   | Imphal              | Manipur           | Not Accredited | Private university |
|                        | NEMLS4  | Martin Luther Christian University                           | Shillong            | Meghalaya         | Not Accredited | Private university |
|                        | NEMLS5  | Indian Institute of Public Health Shillong                   | Shillong            | Meghalaya         | Not Accredited | Private university |
|                        | NEARP6  | Himalayan University                                         | Papum Pare District | Arunachal Pradesh | Not Accredited | Private university |
|                        | NEARWS7 | North East Frontier Technical University (NEFTU)             | West Siang Distt    | Arunachal Pradesh | Not Accredited | Private university |
| <b>EAST</b>            | EJHR1   | YBN University                                               | Ranchi              | Jharkhand         | Not Accredited | Private university |
|                        | EWBK2   | Institute of Management Study                                | Kolkata             | West Bengal       | Accredited     | State university   |
|                        | EWBK3   | NSHM Knowledge campus                                        | Kolkata             | West Bengal       | Accredited     | State university   |
|                        | EWBK4   | KPC Medical College and Hospital                             | Kolkata             | West Bengal       | Not Accredited | State university   |
|                        | EWBK5   | Haldia Institute of Management                               | Kolkata             | West Bengal       | Accredited     | State university   |
|                        | EODK6   | Kalinga Institute of Industrial Technology University (KIIT) | Bhubaneswar         | Odisha            | Accredited     | Deemed university  |

|         |        |                                                                           |                              |               |                |                                               |
|---------|--------|---------------------------------------------------------------------------|------------------------------|---------------|----------------|-----------------------------------------------|
|         | EODK7  | Asian Institute of Public Health (AIPH)                                   | Bhubaneswar                  | Odisha        | Not Accredited | Private university                            |
|         | EODK8  | Indian Institute of Public Health Orrisa                                  | Bhubaneswar                  | Odisha        | Accredited     | State university                              |
|         | EODK9  | ICMR-Regional Medical Research Centre                                     | Bhubaneswar                  | Odisha        | Accredited     | State university                              |
|         | EODC10 | Ravenshaw University                                                      | Cuttack                      | Odisha        | Accredited     | State university                              |
|         | EODC11 | Sri International College                                                 | Cuttack                      | Odisha        | Accredited     | State university                              |
| CENTRAL | CCHR1  | All India Institute of Medical Sciences (AIIMS)                           | Raipur                       | Chhattisgarh  | Not Accredited | UGC approved Institute of National Importance |
|         | CUPN2  | Amity Institute of Public Health & Hospital Administration                | Noida                        | Uttar Pradesh | Accredited     | Private university                            |
|         | CUPP3  | Shalom Institute of Health and Allied Sciences (SIHAS)                    | Allahabad                    | Uttar Pradesh | Not Accredited | Deemed university                             |
|         | CUPG4  | Noida School of Allied Health Sciences                                    | Gautam Buddha Nagar district | Uttar Pradesh | Not Accredited | Private university                            |
|         | CUPL5  | Maharishi University of Information Technology                            | Lucknow                      | Uttar Pradesh | Not Accredited | Private university                            |
|         | CUPL6  | Institute of Natural Sciences & Humanities                                | Lucknow                      | Uttar Pradesh | Accredited     | Private university                            |
|         | CUPA7  | Dr Ram Manohar Lohia Avadh University (RMLAU)                             | Ayodhya                      | Uttar Pradesh | Not Accredited | State university                              |
|         | CUPGh8 | ICRI- Ghaziabad campus (executive mph)                                    | Ghaziabad                    | Uttar Pradesh | Not Accredited | Private university                            |
|         | CUPL9  | Dr. Giri Lal Gupta Institute of Public Health and Public Affair (GLGIOPH) | Lucknow                      | Uttar Pradesh | Accredited     | State university                              |
|         | CUPB10 | Bareilly International University                                         | Bareilly                     | Uttar Pradesh | Not Accredited | Private university                            |

|      |        |                                                                |                        |                |                |                                               |
|------|--------|----------------------------------------------------------------|------------------------|----------------|----------------|-----------------------------------------------|
|      | CUKD11 | All India Institute of Medical Sciences (AIIMS)                | Rishikesh              | Uttarakhand    | Not Accredited | UGC approved Institute of National Importance |
|      | CUKP12 | Maharaja Agrasen Himalayan Garhwal University (MAHGU)          | Pauri Garhwal district | Uttarakhand    | Not Accredited | Private university                            |
|      | CUKD13 | Combined PG Institute of Medical Sciences and Research Private | Dehradun               | Uttarakhand    | Not Accredited | Central university                            |
|      | CUKH14 | Sri Ram Educational and Welfare Trust-Bhartiya Mahavidyalaya   | Roorkee                | Uttarakhand    | Not Accredited | State university                              |
|      | CUKD15 | Uttaranchal College of Health Sciences                         | Dehradun               | Uttarakhand    | Accredited     | Private university                            |
|      | CUKD16 | ICRI-Bhopal campus                                             | Bhopal                 | Madhya Pradesh | Not Accredited | Private university                            |
|      | CMPB17 | Rabindranath Tagore University                                 | Raisen district        | Madhya Pradesh | Accredited     | Private university                            |
|      | CMPR18 | Azim Premji University Bhopal campus                           | Bhopal                 | Madhya Pradesh | Not Accredited | Private university                            |
|      | CMPB19 | Swami Vivekanand University                                    | Sagar district         | Madhya Pradesh | Not Accredited | Private university                            |
|      | CMPS20 | Sai group of institutions                                      | Dehradun               | Uttarakhand    | Not Accredited | Not approved                                  |
| WEST | WGJS1  | P P Savani University                                          | Surat                  | Gujarat        | Not Accredited | Private university                            |
|      | WGJV2  | Parul University                                               | Vadodara               | Gujarat        | Accredited     | Private university                            |
|      | WGJAh3 | Indian Institute of Public Health Gandhinagar                  | Ahmedabad              | Gujarat        | Not Accredited | Private university                            |
|      | WGJAn4 | Bhaikaka University                                            | Anand district         | Gujarat        | Not Accredited | Private university                            |
|      | WMHPu5 | Symbiosis Institute of Health Sciences                         | Pune                   | Maharashtra    | Accredited     | Deemed university                             |
|      | WMHW6  | Datta Meghe Institute of Higher Education and Research         | Wardha                 | Maharashtra    | Accredited     | Deemed university                             |
|      | WMHAh7 | Pravara Institute of Medical Sciences University               | Ahmednagar             | Maharashtra    | Not Accredited | Deemed university                             |

|              |         |                                                                                                 |                    |             |                |                                               |
|--------------|---------|-------------------------------------------------------------------------------------------------|--------------------|-------------|----------------|-----------------------------------------------|
|              | WMHPu8  | MIT World Peace University (MIT WPU)                                                            | Pune               | Maharashtra | Not Accredited | Private university                            |
|              | WMHPu9  | Dr D Y Patil Vidyapeeth                                                                         | Pune               | Maharashtra | Accredited     | Deemed university                             |
|              | WMHS10  | Krishna Institute of Medical Sciences (KIMS)                                                    | Satara district    | Maharashtra | Accredited     | Deemed university                             |
|              | WMHTh11 | Padmashree D Y Patil University                                                                 | Mumbai             | Maharashtra | Accredited     | Deemed university                             |
|              | WMHN12  | Maharashtra University of Health Sciences                                                       | Nashik             | Maharashtra | Not Accredited | State university                              |
|              | WMHRa13 | MGM School of Biomedical Sciences                                                               | Mumbai             | Maharashtra | Accredited     | Deemed university                             |
|              | WMHP14  | Savitribai Phule Pune University                                                                | Pune               | Maharashtra | Not Accredited | State university                              |
|              | WMHM15  | National Institute of Public Health Training and Research ministry of health and family welfare | Mumbai             | Maharashtra | Not Accredited | State university                              |
|              | WMHM16  | ICRI-Mumbai                                                                                     | Mumbai             | Maharashtra | Not Accredited | Private university                            |
| <b>SOUTH</b> | WMHM17  | Indian School of Technology and Management                                                      | Mumbai             | Maharashtra | Not Accredited | Not Approved                                  |
|              | SPYP1   | Jawaharlal Institute of Postgraduate Medical Education & Research (JIPMER)                      | -                  | Puducherry  | Not Accredited | UGC approved Institute of National Importance |
|              | SPYP2   | Vinayaka Mission's Research Foundation AVMC campus                                              | -                  | Puducherry  | Accredited     | Deemed university                             |
|              | STSRR3  | University of Hyderabad                                                                         | Hyderabad          | Telangana   | Accredited     | Central university                            |
|              | STSRR4  | Indian Institute of Public Health Hyderabad                                                     | Hyderabad          | Telangana   | Not Accredited | State university                              |
|              | SKLT5   | Sree Chitra Tirunal Institute for Medical Sciences and Technology                               | Thiruvananthapuram | Kerala      | Not Accredited | UGC approved Institute of National Importance |

|  |         |                                                                     |                    |            |                |                                               |
|--|---------|---------------------------------------------------------------------|--------------------|------------|----------------|-----------------------------------------------|
|  | SKLE6   | Amrita Institute of Medical Sciences and Research Centre            | Kochi              | Kerala     | Accredited     | Deemed university                             |
|  | SKLKA7  | Central University of Kerala                                        | Kasaragod district | Kerala     | Accredited     | Central university                            |
|  | SKLKO8  | CENTRE for Professional and Advanced Studies                        | Kottayam           | Kerala     | Not Accredited | State university                              |
|  | SKLT9   | Global Institute of Public Health                                   | Thiruvananthapuram | Kerala     | Not Accredited | State university                              |
|  | STNV10  | Christian Medical College                                           | Vallore            | Tamil Nadu | Not Accredited | UGC approved Institute of National Importance |
|  | STNC11  | Sri Ramachandra Institute of Higher Education and Research (SRIHER) | Chennai            | Tamil Nadu | Accredited     | Deemed university                             |
|  | STNCh12 | SRM Institute of Science and Technology (SRMIST)                    | Chennai            | Tamil Nadu | Accredited     | Deemed university                             |
|  | STNS13  | Vinayaka Mission's Research Foundation Salem campus                 | Salem              | Tamil Nadu | Accredited     | Deemed university                             |
|  | SKAM14  | JSS Academy of Higher Education and Research                        | Mysore             | Karnataka  | Accredited     | Deemed university                             |
|  | SKAB15  | Jawaharlal Nehru Medical College                                    | Belagavi           | Karnataka  | Accredited     | Deemed university                             |
|  | SKABu16 | Dayanand Sagar University                                           | Bangalore          | Karnataka  | Not Accredited | Private university                            |
|  | SKADk17 | Edward & Cynthia Institute of Public Health                         | Mangaluru          | Karnataka  | Accredited     | Deemed university                             |
|  | SKAB18  | MS Ramaiah University of Applied Sciences Gnanagangothri campus     | Bangalore          | Karnataka  | Not Accredited | Private university                            |
|  | KABu19  | Padmashree institute of public health                               | Bangalore          | Karnataka  | Not Accredited | State university                              |
|  | SKAB20  | National Institute of Mental Health and Neurosciences (NIMHANS)     | Bangalore          | Karnataka  | Not Accredited | UGC approved Institute of National Importance |

|  |         |                                                                          |                |                |                |                    |
|--|---------|--------------------------------------------------------------------------|----------------|----------------|----------------|--------------------|
|  | SKAK21  | Sri Devraj Urs Academy of Higher Education and Research                  | Kolar          | Karnataka      | Accredited     | Deemed university  |
|  | SKAG22  | Karnataka State Rural Development and Panchayat Raj University (KSRDPRU) | Gadag district | Karnataka      | Not Accredited | State university   |
|  | SKAU23  | Prasanna School of Public Health                                         | Udupi          | Karnataka      | Accredited     | Deemed university  |
|  | SKADk24 | KS Hegde Medical Academy                                                 | Mangaluru      | Karnataka      | Accredited     | Deemed university  |
|  | SAPC25  | The Apollo University                                                    | Chitoor        | Andhra Pradesh | Not Accredited | Private university |
|  | SAPC26  | Om Sri Gayatryviswakarma University                                      | Chittoor       | Andhra Pradesh | Not Accredited | Not Approved       |
